# Supplementary material
Source: PubMed Central journal article supplement (PMC3195643)
Supplement: supp_M111.274639_jbc.M111.274639-1.pdf [file supp_M111.274639_jbc.M111.274639-1.pdf]

A

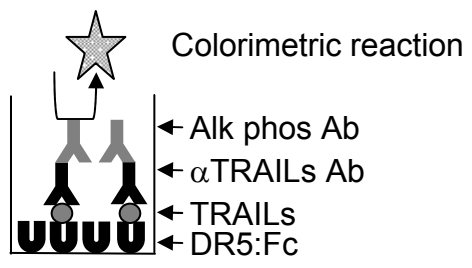

B

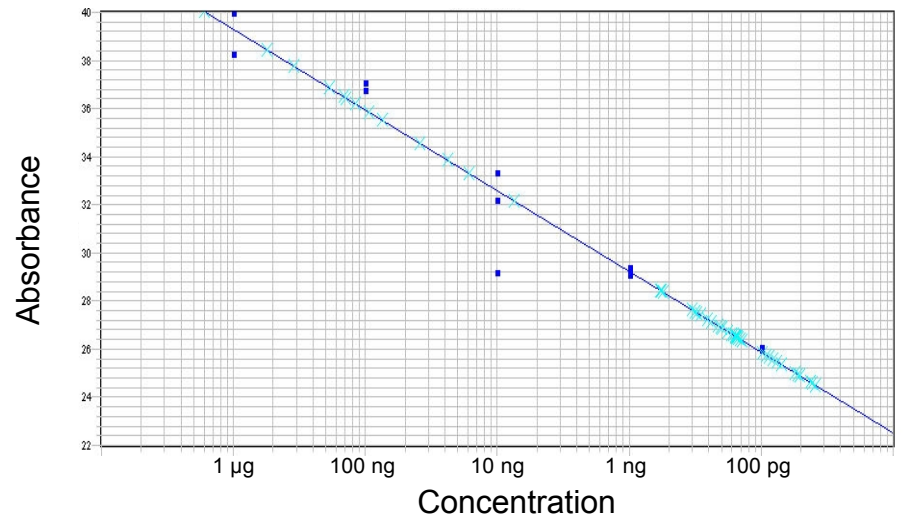

Supplemental figure 1: (A) schematic representation of the approach for TRAIL-s specific ELISA. (B) standard curve for TRAIL-s ELISA, with blue dots representing experimental samples.
